# Supplementary material for: Biaxial Shear Crack Propagation Modes of Rock‐Like Specimens with Prefabricated Fissures and Their Strength Characteristics
Source: Hindawi journal article supplement (doi:10.1155/2021/7248926), 2021-01-01
Supplement: f1 [file 7248926.f1.docx]

The test results of some precast fractured rock-like specimens are as follows. As shown in Figure 1 and Figure 2.


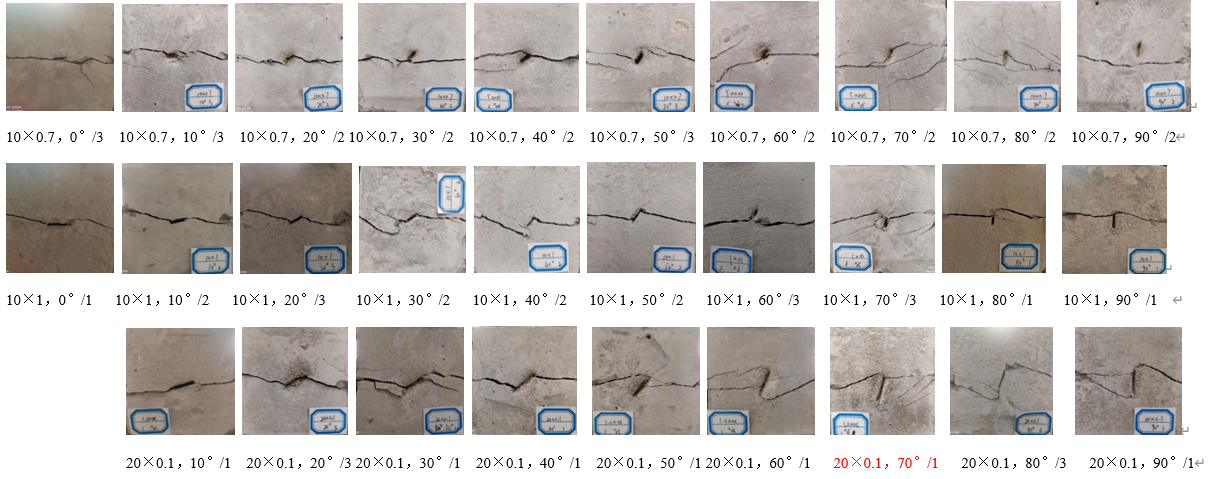


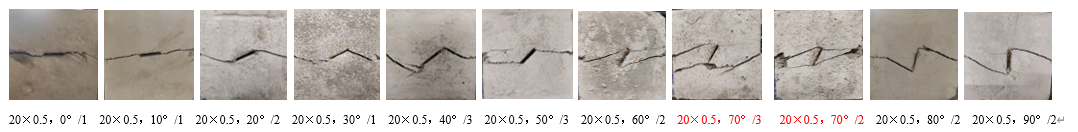


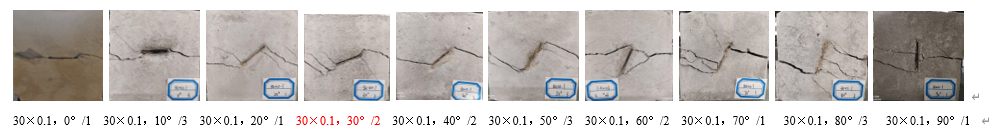


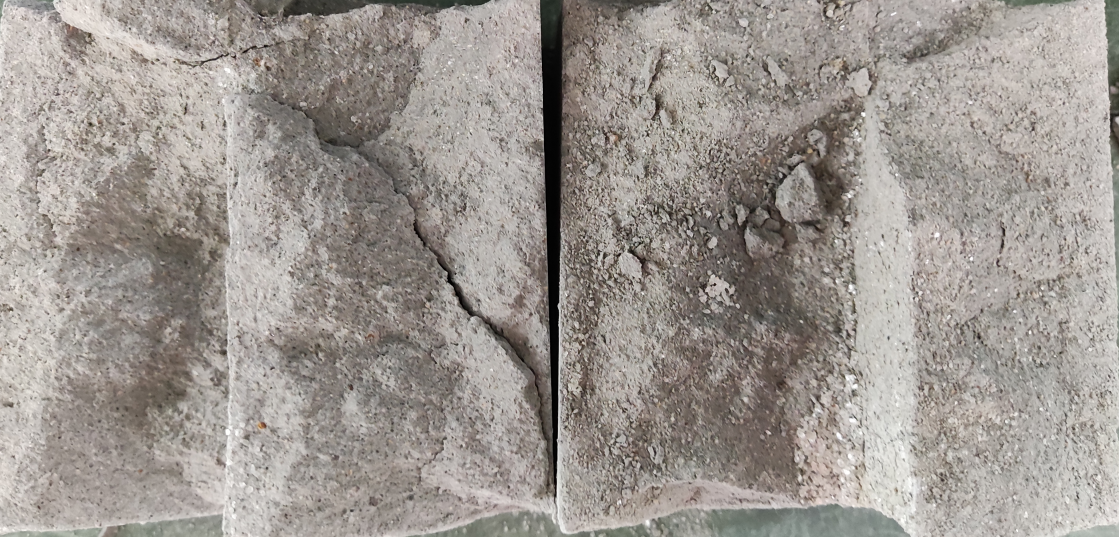

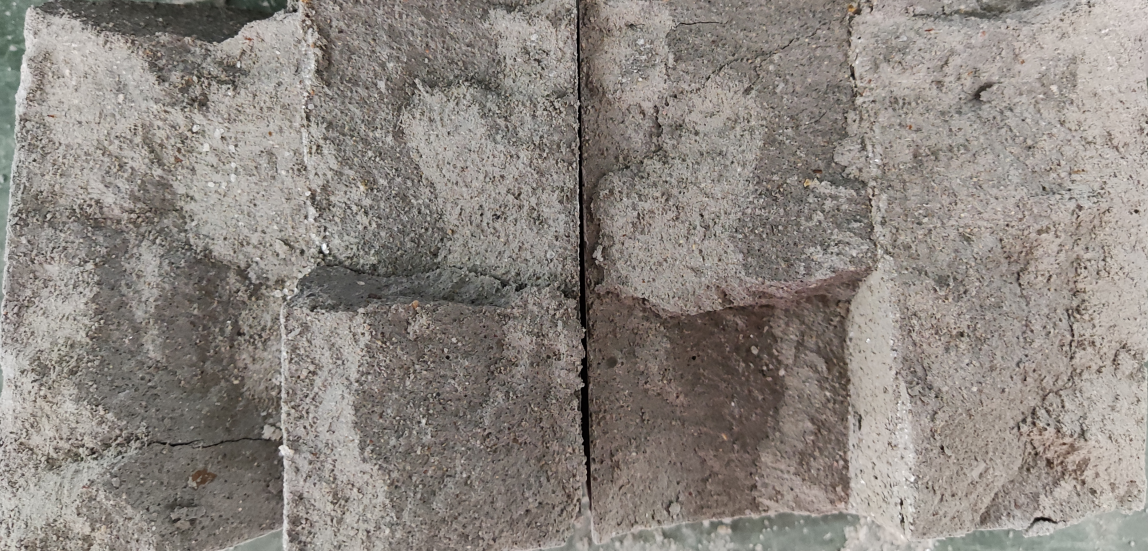


Fig. 1 Test diagram of some prefabricated crack specimens


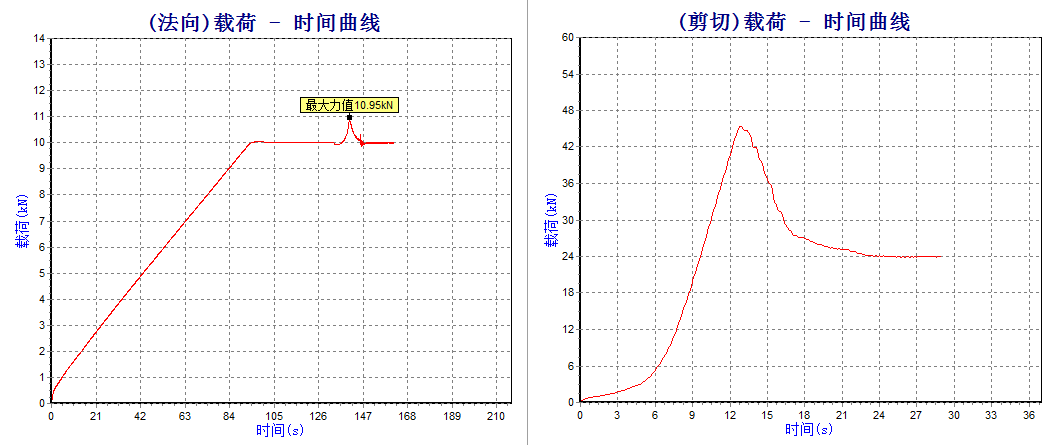

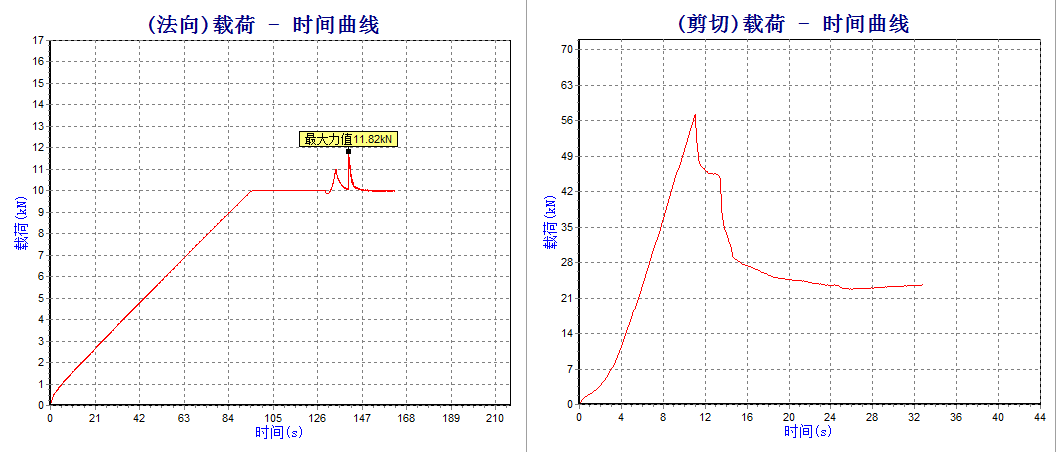


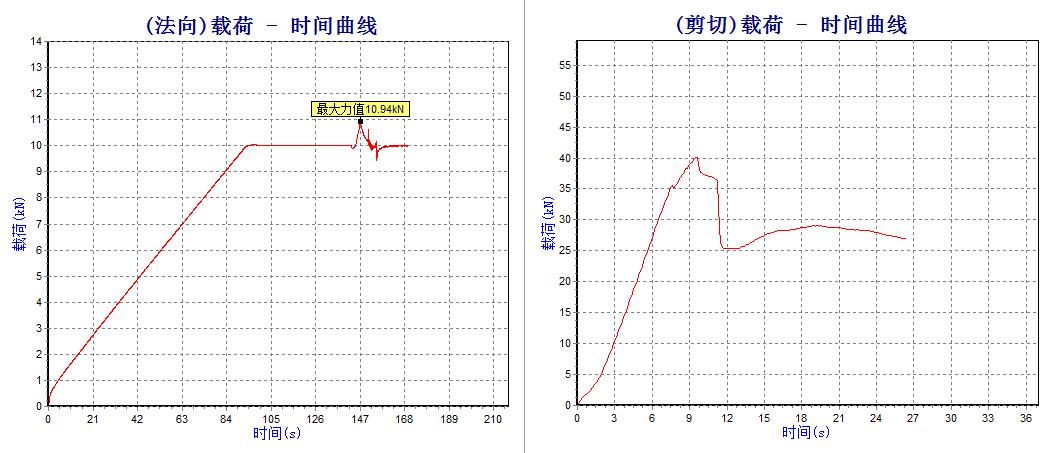

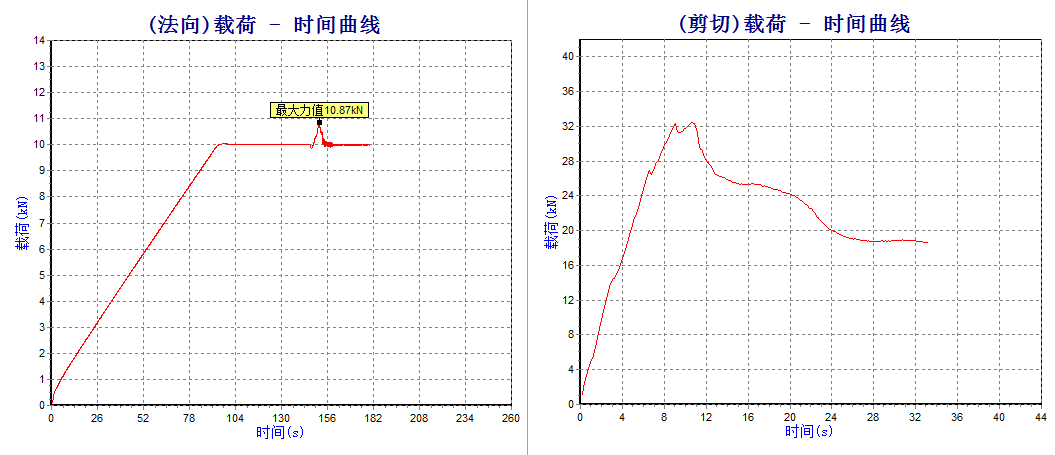


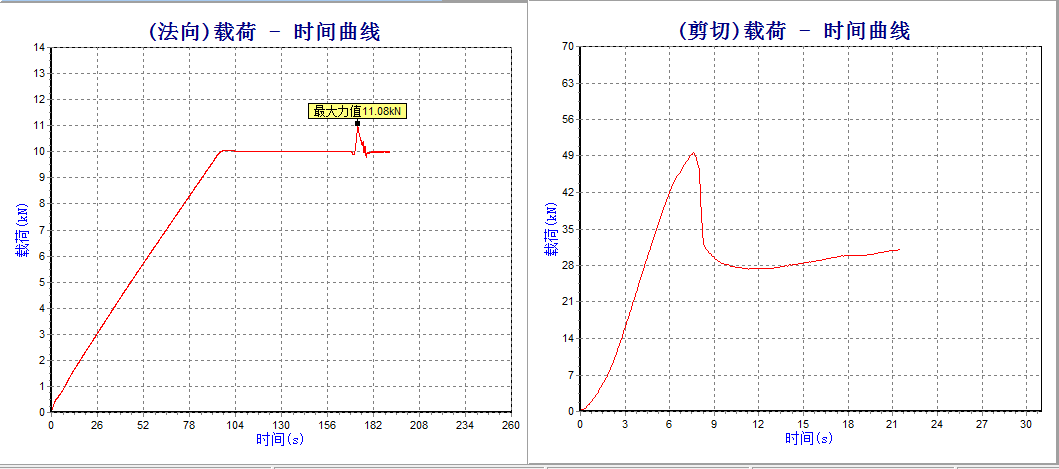

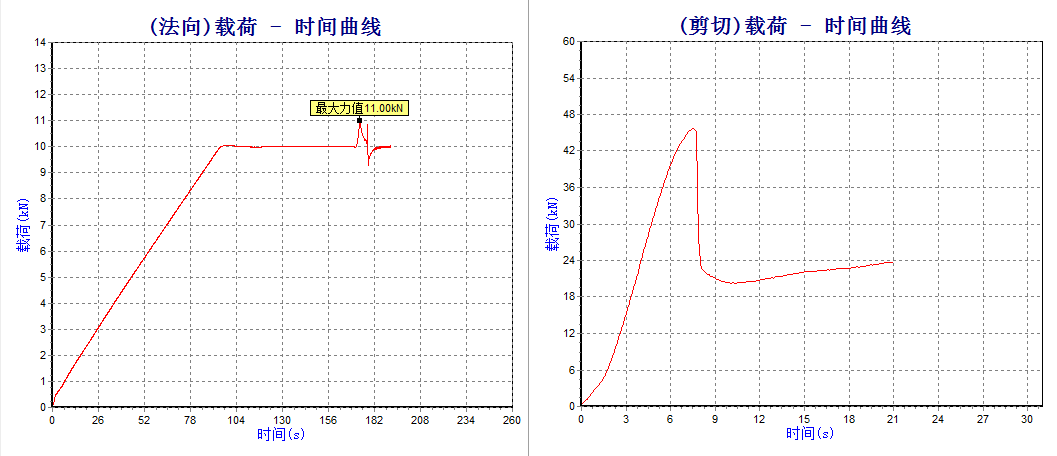


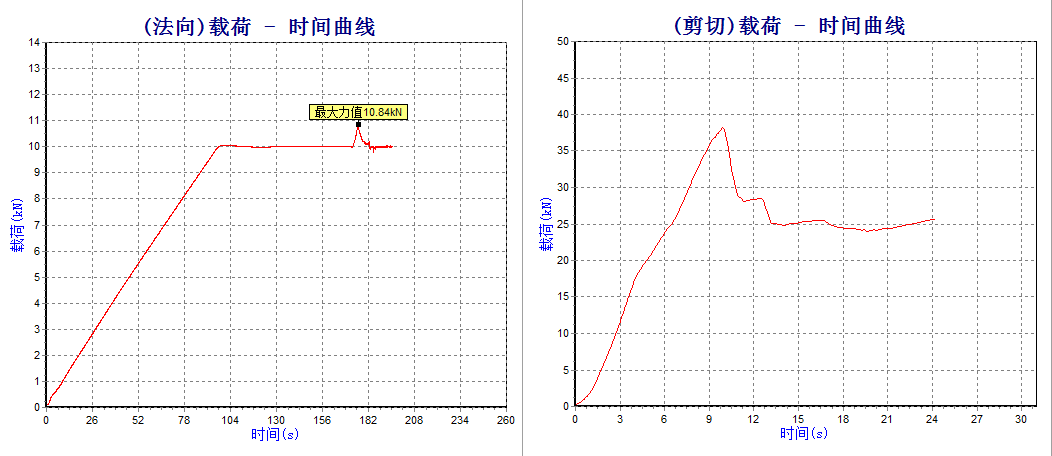

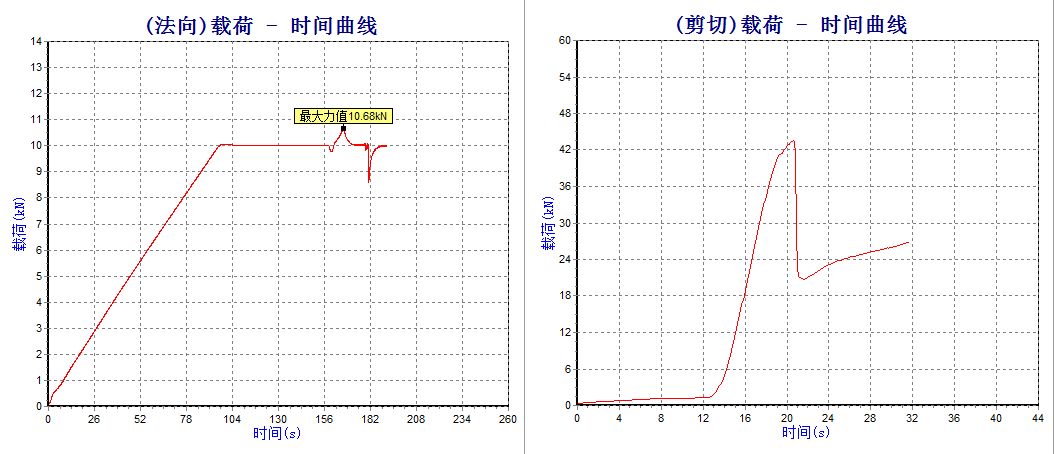


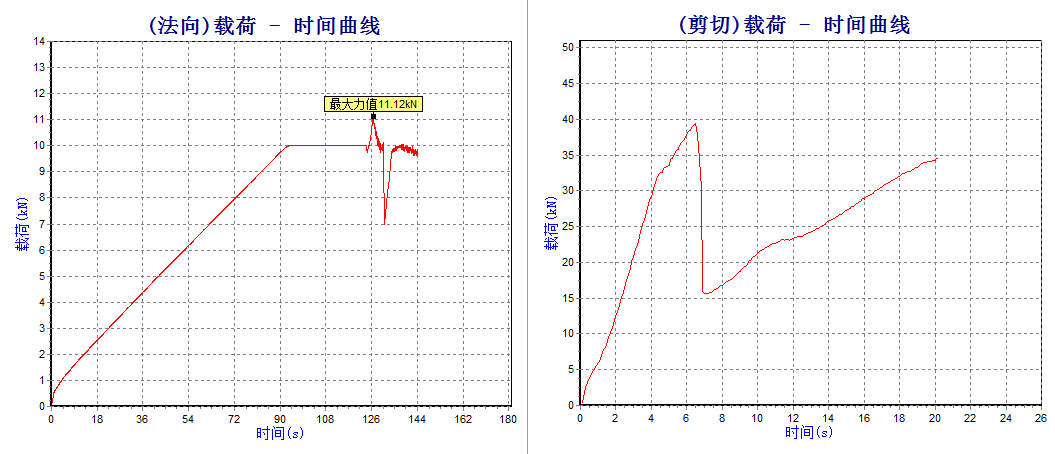

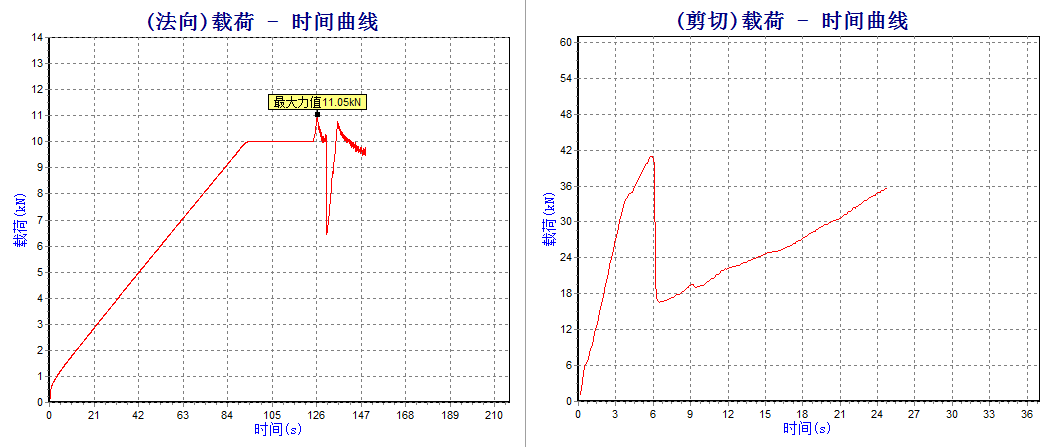


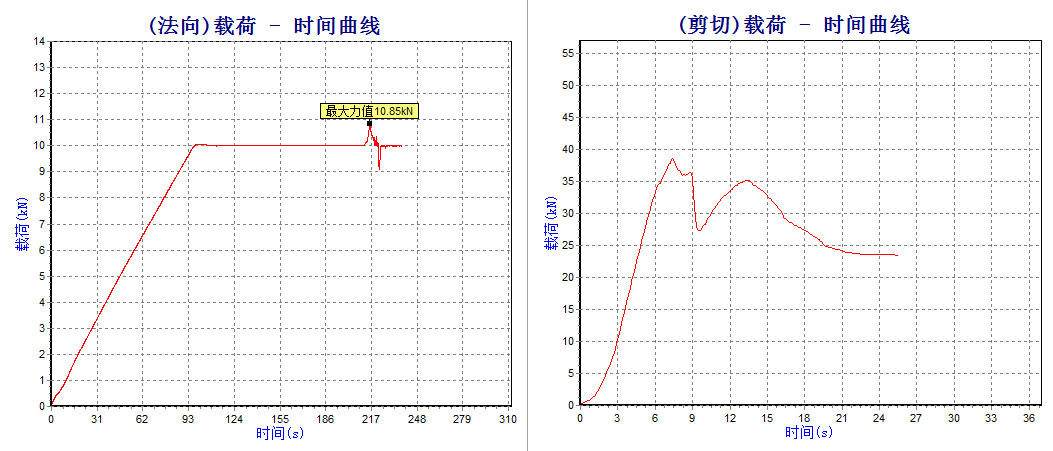

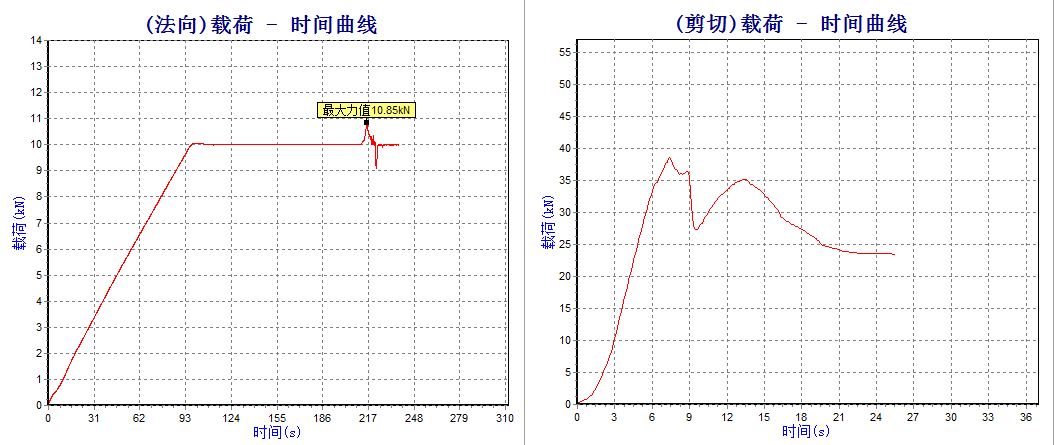


Fig. 2 Relation Curve between Load of some specimens and time

The summary test results are listed in Table 1.

Table 1 Shear test data of rock-like specimens with prefabricated fissures
